1 A highly endemic area of *Echinococcus multilocularis* identified  
2 through a comparative re-assessment of prevalence in red fox  
3 (*Vulpes vulpes*), Alto Adige (Italy: 2019-2020)

4 Federica Obber <sup>1¶\*</sup>, Roberto Celva <sup>1¶</sup>, Graziana Da Rold <sup>1</sup>, Karin Trevisiol <sup>1</sup>, Silvia Ravagnan <sup>1</sup>, Patrizia  
5 Danesi <sup>1</sup>, Lucia Cenni <sup>2-3</sup>, Chiara Rossi <sup>2</sup>, Paola Bonato <sup>1</sup>, Katia Capello <sup>1</sup>, Heidi C. Hauffe <sup>2</sup>, Alessandro  
6 Massolo <sup>3</sup>, Rudi Cassini <sup>4</sup>, Valentina Benvenuti <sup>4</sup>, Andreas Agreiter <sup>5</sup>, Davide Righetti <sup>5</sup>, Marco Ianniello  
7 <sup>6</sup>, Debora Dellamaria <sup>1</sup>, Gioia Capelli <sup>1</sup>, Carlo V. Citterio <sup>1</sup>

8

9 Affiliations

10 1. Istituto Zooprofilattico Sperimentale delle Venezie, Legnaro (PD), Italy

11 2. Conservation Genetics Research Unit, Centre for Research and Innovation, Fondazione Edmund  
12 Mach, San Michele All'Adige (TN), Italy

13 3. Ethology Unit, Department of Biology, University of Pisa, Pisa, Italy

14 4. Department of Animal Medicine, Production and Health (MAPS) - University of Padua, Legnaro  
15 (PD), Italy

16 5. Wildlife Management Office, Province of Bolzano, Bolzano (BZ), Italy

17 6. Ministry of Health, Directorate General for Animal Health and Veterinary Drugs, Rome, Italy

18

19 Equal contributions:

20 <sup>¶</sup>These authors have contributed equally to this work

21

22 \*Corresponding author: Federica Obber

23 E-mail: [fobber@izsvenezie.it](mailto:fobber@izsvenezie.it)

## 24 ABSTRACT

25 **Background:** Surveillance of *E. multilocularis* at the edge of its range is hindered by fragmented  
26 distributional patterns and low prevalence and burden in definitive hosts. Thus, tests with adequate  
27 levels of sensitivity are especially important for discriminating between infected and non-infected  
28 areas.

29 **Aim:** We reassessed the prevalence of *E. multilocularis* at the southern border of its distribution in  
30 Alto Adige (Italy), to improve surveillance in wildlife and provide more accurate estimates of exposure  
31 risk.

32 **Methods:** We compared results from the diagnostic test currently implemented for surveillance  
33 (based on Coproscopy+Multiplex PCR - CMPCR), against a real-time quantitative PCR (qPCR) for 235  
34 fox faeces collected in 2019-2020. The performances of the two tests were estimated using a scraping  
35 technique (SFCT) as the gold standard applied to the small intestines of a subsample (n=123) of the  
36 same hosts. True prevalence was calculated and sample size required by each faecal test for the  
37 detection of the parasite was then estimated.

38 **Results:** True prevalence of *E. multilocularis* in foxes (14.3%) was definitely higher than reported in  
39 the last decade (never >5% from 2012 to 2018). The qPCR also had a higher sensitivity (83%)  
40 compared to CMPCR (21%). Agreement with the gold standard was far higher for qPCR (0.816) than  
41 CMPCR (0.298) as well, determining a smaller sample size required to detect the disease.

42 **Conclusions:** Alto Adige should be considered a highly endemic area. Surveillance at the edges of *E.*  
43 *multilocularis* distribution should adopt qPCR diagnostics on definitive hosts on a small geographic  
44 scale.

45

46

## 47 **AUTHOR SUMMARY**

48 *Echinococcus multilocularis* is an intestinal flatworm, whose adult stage in Europe is harboured mainly  
49 by the red fox (*Vulpes vulpes*), which spreads parasite's eggs by faeces. This parasite is the agent of a  
50 severe and potentially lethal zoonosis, the alveolar echinococcosis, affecting humans after accidental  
51 ingestion of parasite's eggs. In the Italian Alpine area, which represents the southernmost border of  
52 *E. multilocularis* European range, surveillance is hindered by a fragmented distributional pattern,  
53 where presence in foxes has been consistently reported only in few isolated foci in Alto Adige  
54 (Bolzano province – Italy) of low prevalence. In order to improve the efficiency of monitoring efforts,  
55 we tested the performances of two diagnostic protocols on fox faeces (sedimentation, filtration,  
56 counting technique followed by standard PCR, and whole stool real-time PCR) against a benchmark  
57 technique on fox intestines (scraping, filtration, counting technique - considered as the gold  
58 standard). This allowed not only to determine qPCR as a far more sensitive and sample-efficient  
59 diagnostic tool for *E. multilocularis* detection in marginally affected areas, but also to re-assess its  
60 prevalence in Alto Adige, which should be considered a highly endemic area. Consequent actions in  
61 the field and modifications in the surveillance strategy should be therefore considered.

62

## 63 **INTRODUCTION**

64 *Echinococcus* spp. (Cestoda, Cyclophyllidea, Taeniidae) are small intestinal tapeworms causing  
65 zoonoses of public health importance worldwide. In the European Union (EU), it is mandatory to  
66 report the detection of these pathogens to national authorities, and their surveillance, prevention  
67 and control are closely regulated for pets, livestock and wildlife.

68 Collection of relevant metadata is also highly recommended by both the Directive EU 2003/99/EC  
69 (monitoring of zoonoses and zoonotic agents) and the Regulation EU 2016/429 ('Animal Health Law').

70 Among these, *Echinococcus multilocularis* has a complex life-history. The sylvatic cycle depends on a  
71 predator-prey system, where the adult (strobilar) stage of the parasite is carried by wild and domestic  
72 canids (definitive hosts: DHs), which in turn become infected by ingesting small rodents (intermediate  
73 hosts: IHs) carrying the larval stage (metacestode) of the pathogen [1]. *E. multilocularis* is the agent  
74 of a severe zoonosis, alveolar echinococcosis [2], which affects more than 18,000 new patients/year  
75 worldwide [3] and more than 150–200/year in the endemic area of central-eastern Europe.

76 In 2019, among the 751 human echinococcosis cases reported in the EU, 147 (26.5%) were  
77 attributable to *E. multilocularis* [4], with an incidence which has been increasing notably in recent  
78 decades [5]. In humans, who act as dead-end IHs, transmission is predominantly food-borne, and  
79 infection occurs when eggs (oncospheres) are ingested with water, wild berries and mushrooms or  
80 garden vegetables contaminated with DH faeces [6]. Oncospheres hatch in the gut, penetrate the  
81 intestinal wall and by the lympho-hematogenous route reach the liver, where they develop into  
82 metacestodes. These multiply asexually, infiltrate the liver and can spread to other organs through a  
83 metastasis-like process [7]. Alveolar echinococcosis develops very slowly in humans, taking from a  
84 few months [5] to 15 years (<https://www.who.int/news-room/fact-sheets/detail/echinococcosis>) to  
85 become clinically evident, although immune-suppressed patients show faster proliferation with  
86 earlier detection [8]. If untreated, prognosis is poor, and even the treatment itself is burdensome, as  
87 it includes a combination of surgery and long-term anti-parasitic therapy [9].

88 In the EU, the DH is predominantly represented by the red fox (*Vulpes vulpes*). From the historically  
89 endemic areas of Switzerland, southeast France and southern Germany, *E. multilocularis* has been  
90 expanding north, to northern France and Scandinavia, as well as east to the Balkans [4; 10-12].  
91 Moreover, in the last two decades this cestode has been found sporadically in southern France [4;  
92 13], as well as northern Italy in both the eastern [14] and western Alps [15], which represents at the  
93 moment the southernmost border of the parasite's distribution in the EU. Although high spatial

94 heterogeneity has been noted, in the endemic areas of central and northern Europe the host-  
95 parasite-environment pattern seems well established and is expected to be more predictable,  
96 whereas the same is not typical of the edges of the distribution [16]. In these areas, long-term  
97 surveillance is crucial to assess possible trends in prevalence and spread, as well as the exposure risk  
98 for humans. To this aim, sensitivity of the available diagnostic tests is of paramount importance, since  
99 worm burden levels are low and the presence of *E. multilocularis* infections in both DHs and IHs may  
100 be very hard to detect.

101 In the Province of Bolzano (Alto Adige, northeastern Alps, Italy), *E. multilocularis* in red foxes was first  
102 detected in early 2000 at a prevalence of about 13%, estimated using a nested PCR on DNA extracted  
103 from fox faeces [14]. In the following years, in order to increase the surveillance area and sample,  
104 another test (Coproscopy+Multiplex PCR [CMPCR] on parasite's eggs) was used to analyse 2872 faecal  
105 samples across northeastern Italy. While optimizing the cost/benefit ratio [17], this test was known  
106 to have a good specificity (93.4%) but a low sensitivity (54.8%), relying on a preliminary screening by  
107 flotation of cestodes' eggs, so that their burden could drop under the detection threshold [18].  
108 CMPCR was used to confirm the persistence of the Alto Adige focus from 2012 to 2018, with an  
109 increasing trend in prevalence in later years, although never higher than 5% annually [17].  
110 Considering the persistence and severity of this zoonosis, the current work aimed to enhance the  
111 sensitivity of *E. multilocularis* surveillance in red foxes, re-assess its prevalence in Alto Adige, and  
112 provide guidelines for a more effective surveillance strategy at the southern edge of its distribution.

113

## 114 **Methods**

115 In 2019 and 2020, 235 red foxes that were legally culled or found as carcasses were collected across  
116 Alto Adige by Provincial wildlife technicians and transported to the Bolzano Laboratory of Istituto  
117 Zooprofilattico Sperimentale delle Venezie (IZSve). To achieve an even sampling regime across the

118 territory, one to four animals were collected from each hunting area (Fig 1). At necropsy, a faecal  
119 sample was taken from the rectum by a sterile glove. Moreover, when it was intact and not damaged  
120 (e.g. by the gun shot), the small intestine was tied off at both ends, removed and stored. Both faecal  
121 samples and small intestines were frozen at -80°C for at least 72h to inactivate *Echinococcus* eggs.  
122 Each faecal sample was then divided into two equal parts and tested for the presence of *E.*  
123 *multilocularis* by two methods:

- 124 1. CMPCR, following Citterio et al. 2021 [17] (at the Parasitology laboratory of IZSVE): briefly, 2  
125 g of faecal matter was examined for *Taeniidae* eggs by flotation, filtration and sieving.  
126 Multiplex PCR amplification and Sanger sequencing were then performed on harvested eggs.
- 127 2. qPCR following Knapp et al. 2016 [19], with minor modifications (at the Animal Genetics  
128 laboratories and Sequencing Platform of the Fondazione E. Mach): in brief, whole DNA was  
129 extracted from 50 mg of faecal sample as described in Santa et al. 2019 [20], followed by qPCR  
130 amplification (Viia 7 Real-time PCR System, ThermoFisher Scientific, Waltham, MA) targeting  
131 the mitochondrial DNA marker *rrnL*, using 10 pmol of species-specific primers for *E.*  
132 *multilocularis* (202 bp) and 0.2 pmol of hydrolysis probe. The qPCR-positive samples were  
133 amplified with the same primer pair and sequenced with the dideoxy chain-termination  
134 protocol on an ABI PRISM 3730xl Genetic Analyzer (Applied Biosystems) using the BigDye  
135 Terminator cycle sequencing kit (Perkin Elmer, Applied Biosystems Division, Foster City, CA,  
136 USA). Sequences were aligned with an *E. multilocularis* reference fragment (GenBank acc. n.  
137 AB018440) using BioEdit 7.0.9 [21].

138 In order to evaluate the performances of the two diagnostic tests, a subsample of fox intestines, was  
139 examined for adult worms by the Scraping, Filtration and Counting Technique (SFCT), considered as  
140 the gold standard for *E. multilocularis* detection, following Santa et al. 2018 [22]. We performed SFCT  
141 on the available small intestines of the foxes that had tested positive for one or both diagnostic tests

142 on faeces (n= 23), plus on a manageable number of fecal-negative samples (n=100), for a total of 123.  
143 Briefly, the pylorus to caecum section of the small intestine was cut into 30 cm lengths, each of which  
144 was then opened longitudinally and rinsed with tap water to remove loose faecal content. The  
145 intestine was then scraped, the resulting wash water was poured through a series of sieves (1000  
146  $\mu\text{m}$ , 212  $\mu\text{m}$  and 75  $\mu\text{m}$ ), and the respective filtrates were collected separately into three distinct  
147 beakers. The filtrates were analysed by stereomicroscope (10X-63X) in 5 cm gridded petri dishes, to  
148 count the adult helminths. Using the SFCT results, sensitivity (Se) and specificity (Sp) with 95% exact  
149 binomial confidence intervals were calculated for each test, and their agreement (Cohen's Kappa) to  
150 the standard was provided. True prevalence (TP) was then estimated, using the adjustment to the  
151 Rogan-Gladen formula as proposed by Lang and Reiczigel for confidence intervals [23]. Finally, the  
152 sample size needed for the detection of *E. multilocularis* by each of the two tests was assessed at the  
153 estimated TP and according to varying expected prevalence using the modified binomial  
154 approximation analysis method implemented in EpiTools  
155 (<https://epitools.ausvet.com.au/freecalctwo>). We set a target population size of 300 individuals on a  
156 local scale (hypothetical epidemiological unit), based on the results of unpublished data from wildlife  
157 management offices in different areas of the northeastern Italian Alps, providing estimated densities  
158 of 2.1, 3.4 and 7.5 foxes/km<sup>2</sup>.

159

## 160 Results

161 The distribution of the 235 fox faecal samples and of the 123 fox small intestines is shown in in Fig 1.

162 Of the 235 fox faecal samples, seven (2.9%) were CMPCR-positive and 34 (14.4%) were qPCR-positive.

163

164 Fig 1 Distribution of individual fox faecal samples from Alto Adige in 2019-2020 (n=235) and subset  
165 examined for adult worms by SFCT (n=123)

166 Adult *E. multilocularis* were found by SFCT in 24/123 (19.5%) fox small intestines (Fig 2) while, for the  
167 same animals, five (4.1%) and 23 (18.7%) faecal samples resulted as CMPCR and qPCR positive,  
168 respectively. Positive outcomes for the three diagnostics are summarized in Table 1.

169

170 Fig 2 Results of the fox fecal samples collected in 2019-2020 (n=123) tested by Coproscopy+Multiplex  
171 PCR (CMPCR), qPCR and Scraping, Filtration and Counting Technique (SFCT- gold standard) for *E.*  
172 *multilocularis* in Alto Adige, Italy

173

174 **Table 1 Matrix of the results of the two faecal tests (CMPCR and qPCR) and the gold standard**  
175 **(SFCT) for the detection of *E. multilocularis* in 123 foxes**

| Test  | Coproscopy + Multiplex PCR (CMPCR) | qPCR      | Scraping, filtration counting technique (SFCT) |
|-------|------------------------------------|-----------|------------------------------------------------|
| CMPCR | 5 (4.1%)                           |           |                                                |
| qPCR  | 5                                  | 23(18.7%) |                                                |
| SFCT  | 5                                  | 20        | 24 (19.5%)                                     |

176

177 Compared to SFCT, CMPCR detected 'true' infections in 5/24 (4.1%) cases, resulting in very poor  
178 sensitivity (Se) (0.21; Table 2), and far lower than previously reported (about 0.55 [18]). Conversely,  
179 qPCR confirmed the SFCT results in 20/24 (86.9%) of the cases, translating into a much higher Se  
180 (0.83; Table 2). The qPCR test also identified three positive samples that were negative for SFCT, and  
181 thus considered as false positives.

182



183 **Table 2 Sensitivity, specificity and agreement (K) for two diagnostic methods (Coproscopy+Multiplex**  
184 **PCR [CMPCR] and qPCR) for detecting *E. multilocularis* in fox fecal samples compared to the Scraping,**  
185 **Filtration and Counting Technique (SFCT - gold standard)**

| Index            | CMPCR versus SFCT (95% CI) | qPCR versus SFCT (95% CI) |
|------------------|----------------------------|---------------------------|
| Sensitivity (Se) | 0.21 (0.07 - 0.42)         | 0.83 (0.63- 0.95)         |
| Specificity (Sp) | 1 (0.96 - 1)               | 0.97 (0.91 - 0.99)        |
| Agreement (K)    | 0.30 (0.09 - 0.50)         | 0.82 (0.68 - 0.95)        |

186

187 Based on the Se and Sp calculated from these results (Table 2), the TP estimated for the whole sample  
188 set (n=235) was 14.30 % (CI95%: 0-29.14) for CMPCR and 14.24% (CI95%: 7.04 -22.64) for qPCR. The  
189 sample size required for the detection of *E. multilocularis* in a fox population of 300 individuals with  
190 various expected prevalences is shown in Fig 3. For example, if the expected prevalence is 15%, about  
191 90 individuals (about one third of the population) should be tested when using CMPCR, whereas  
192 about 60 individuals (20%) would be enough to detect parasite presence by qPCR.

193

194 **Fig 3 Sample size required to detect *E. multilocularis* at various expected prevalences (with 95% CI)**  
195 **in a population of 300 foxes, based on Sensitivity and Specificity of CMPCR and qPCR estimated here.**  
196 **Regression was obtained by interpolating 13 prevalence values.**

197

## 198 Discussion

199 Our results lead to the conclusion that the true prevalence of *E. multilocularis* in Alto Adige has been  
200 higher than previously reported in the last decade (<5%). According to the standards proposed by  
201 Casulli et al. (2015), this region should now be considered as highly endemic (prevalence >10%) [24],  
202 suggesting that surveillance should be intensified both locally and in the bordering territories.

203 The methods most widely used in the EU for detecting *E. multilocularis* in animal carcasses are  
204 modifications of techniques targeting adult parasites, such as the sedimentation and counting (SCT)  
205 and intestinal scraping (IST) [24]; the copro-antigen ELISA test [25]; or PCR [26] for species  
206 determination. However, methods aimed at detecting adult helminths have practical limitations,  
207 since they require the collection and necropsy of a consistent number of DHs throughout a study  
208 area, storage capacity of large volumes of organs temporarily at -80°C (for ensuring positive samples  
209 are not infective) and long-term at -20°C (for storage), as well as being time-consuming (at least 3  
210 hours for each sample). Therefore, methods on faeces remain the best option for surveillance, given  
211 also that faecal samples can be collected in the field using a standardized protocol, and many samples  
212 can be screened simultaneously and rapidly. Surveillance coupling monitoring faeces of both fox  
213 carcasses and scats would better encompass the life cycle of both the parasite and its main definitive  
214 host throughout the year, and faecal prevalence could be used as a proxy for human risk of exposure.  
215 In addition, non-invasive collection and genotyping of scats would allow repeated sampling on the  
216 same fox social groups, tracking the seasonal pattern of infective eggs shedding at an individual level.  
217 Antigenic and molecular tests are rapid and useful in regions characterized by a high parasitic  
218 presence [27], but copro-antigen ELISA has the disadvantage of a low sensitivity, especially in the  
219 case of low parasitic burden [24]: molecular methods remain therefore the best option. Based on our  
220 results, tests directly applied on faeces, as qPCR, are recommended: in fact, besides reducing the  
221 number of samples needed to detect the infection (Fig 3) and consequently, the sampling effort and  
222 the cost of analyses, qPCR would also be the best option for detecting parasite DNA from scats  
223 collected in the field, since these generally result in poor quality DNA compared to fresh fecal samples  
224 taken during necropsies [28]. The higher sensitivity of qPCR is offset by an apparent decrease in  
225 specificity, suggested by the three positive samples not identified by SFCT (see also [29]). However,  
226 since SFCT is designed to detect adult worms, it may be that the extra positive samples detected by

227 qPCR were indications of late infections, when traces of parasite DNA may still be present in the  
228 intestine but adult helminths are no longer macroscopically detectable or, on the contrary, of early  
229 infections, when immature parasites (scolices) are present but are very difficult to identify  
230 microscopically [14].

231 At the edges of *E. multilocularis* distribution, an efficient strategy for surveillance would be to  
232 progressively include areas bordering the foci, in which the parasite could have gone undetected, or  
233 in which *E. multilocularis* had been found occasionally, but no further confirmed, using qPCR as the  
234 main diagnostic tool. In such a framework, we suggest that surveillance in foxes should be performed  
235 on a small scale (e.g. considering an area similar to an Alpine valley as the basic epidemiological unit)  
236 rather than a larger one (e.g. using the NUTS at level 1 or 2, as recommended for *E. granulosus* by  
237 Tamarozzi et al. 2020 [30]). This would optimize efforts by increasing the chances of detecting *E.*  
238 *multilocularis* in areas previously considered free from the parasite. Moreover, such a detailed  
239 surveillance would be more informative of the actual risk of exposure for humans.

240 Finally, it is worth noting that a high endemicity of *E. multilocularis*, as that found in Alto Adige, should  
241 be a mandate for increased surveillance of possible human cases, as well as infections in domestic  
242 dogs. As dog infection could definitely increase the risk to humans, we suggest that this surveillance  
243 also use the most sensitive molecular tools available.

244

245 **Conflict of interest:** None declared

246 **Funding statement:** This work received funding from the Italian Ministry of Health (project  
247 codes: IZSve RC 03/11; IZSve RC 18/2016; IZSve RC 05/19).

248

249

## 250 Authors' contributions

|                                             |                                                                                                                                                        |
|---------------------------------------------|--------------------------------------------------------------------------------------------------------------------------------------------------------|
| <b>Conceptualization</b>                    | Carlo Vittorio Citterio, Heidi Christine Hauffe, Alessandro Massolo, Federica Obber, Roberto Celva, Lucia Cenni                                        |
| <b>Data Curation</b>                        | Federica Obber, Roberto Celva, Lucia Cenni                                                                                                             |
| <b>Formal Analysis</b>                      | Katia Capello, Roberto Celva, Carlo V. Citterio, Federica Obber, Rudi Cassini, Alessandro Massolo                                                      |
| <b>Funding Acquisition</b>                  | Carlo V. Citterio                                                                                                                                      |
| <b>Investigation</b>                        | Lucia Cenni, Roberto Celva, Graziana Da Rold, Valentina Benvenuti                                                                                      |
| <b>Methodology</b>                          | Silvia Ravagnan, Patrizia Danesi, Alessandro Massolo, Chiara Rossi, Rudi Cassini                                                                       |
| <b>Project Administration</b>               | Carlo V. Citterio                                                                                                                                      |
| <b>Resources</b>                            | Karin Trevisiol, Andreas Agreiter, Davide Righetti, Debora Dellamaria                                                                                  |
| <b>Supervision</b>                          | Gioia Capelli                                                                                                                                          |
| <b>Visualization</b>                        | Federica Obber, Roberto Celva, Paola Bonato                                                                                                            |
| <b>Writing – Original Draft Preparation</b> | Federica Obber, Roberto Celva, Carlo V. Citterio                                                                                                       |
| <b>Writing – Review &amp; Editing</b>       | Federica Obber, Roberto Celva, Carlo V. Citterio, Alessandro Massolo, Heidi C. Hauffe, Rudi Cassini, Debora Dellamaria, Marco Ianniello, Gioia Capelli |

251

## 252 References

- 253 1. Romig T, Deplazes P, Jenkins D, Giraudoux P, Massolo A, Craig PS, et al. Ecology and life cycle  
254 patterns of *Echinococcus* Species. *Adv Parasitol.* 2017; 95:213–314.  
255 doi:10.1016/bs.apar.2016.11.002.
- 256 2. Bouwknegt M, Devleeschauwer B, Graham H, Robertson LJ, van der Giessen JW. The Euro-Fbp  
257 Workshop Participants. Prioritisation of foodborne parasites in Europe, 2016. *Euro Surveill.* 2018;  
258 23(9):17-00161. doi:10.2807/1560-7917.ES.2018.23.9.17-00161.
- 259 3. Torgerson PR, Keller K, Magnotta M, Ragland N. The Global Burden of Alveolar Echinococcosis.  
260 *PLoS Negl Trop Dis.* 2010; 4(6): e722. doi:10.1371/journal.pntd.0000722

- 261 4. EFSA and ECDC (European Food Safety Authority and European Centre for Disease Prevention and  
262 Control), 2021. The European Union One Health 2019 Zoonoses Report. *EFSA J.* 2021; Feb 27; 19(2):  
263 e6406. doi:10.2903/j.efsa.2021.6406.
- 264 5. Vuitton DA, Demonmerot F, Knapp J, Richou C, Grenouillet F, Chauchet A, et al. Clinical  
265 epidemiology of human AE in Europe. *Vet Parasitol.* 2015; Oct 30; 213(3–4): 110-20. doi:  
266 10.1016/j.vetpar.2015.07.036
- 267 6. Lass A, Szostakowska B, Myjak P, Korzeniewski K. The first detection of *Echinococcus multilocularis*  
268 DNA in environmental fruit, vegetable, and mushroom samples using nested PCR. *Parasitol Res.* 2015;  
269 114(11):4023–9. doi:10.1007/s00436-015-4630-9
- 270 7. Kern P, Menezes da Silva A, Akhan O, Müllhaupt B, Vizcaychipi KA, Budke C, et al. The  
271 Echinococcoses: Diagnosis, Clinical Management and Burden of Disease. *Adv Parasitol.* 2017; 96:259-  
272 369. doi:10.1016/bs.apar.2016.09.006
- 273 8. Chauchet A, Grenouillet F, Knapp J, Richou C, Delabrousse E, Dentan C, et al. Increased incidence  
274 and characteristics of alveolar echinococcosis in patients with immunosuppression-associated  
275 conditions. *Clin Infect Dis.* 2014; 15; 59(8):1095-104. doi:10.1093/cid/ciu520
- 276 9. Brunetti E, Kern P, Vuitton DA. Writing Panel for the WHO-IWGE. Expert consensus for the diagnosis  
277 and treatment of cystic and alveolar echinococcosis in humans. *Acta Trop.* 2010; Apr; 114(1):1-16.  
278 doi:10.1016/j.actatropica.2009.11.001
- 279 10. Combes S, Comte S, Raton V, Raoul F, Boue F, Umhang G, et al. Westward spread of *Echinococcus*  
280 *multilocularis* in foxes, France, 2005–2010. *Emerg Infect Dis.* 2012; Dec 18: 2059-62. doi:  
281 10.3201/eid1812.120219
- 282 11. Deplazes P, Rinaldi L, Alvarez Rojas CA, Torgerson PR, Harandi MF, Romig T. Global distribution of  
283 alveolar and cystic echinococcosis. R.C.A. Thompson, P.D., A.J. Lymbery (Eds.), *Adv. Parasitol.* 2017;  
284 95: 315-493. doi:10.1016/bs.apar.2016.11.001

- 285 12. EFSA AHAW Panel (EFSA Panel on Animal Health and Welfare), 2015. Scientific opinion on  
286 *Echinococcus multilocularis* infection in animals. EFSA J. 2015; 13(12):4373, 129 pp.  
287 doi:10.2903/j.efsa.2015.4373
- 288 13. Umhang G, Comte S, Hormaz V, Boucher JM, Raton V, Favier S, et al. Retrospective analyses of  
289 fox feces by real-time PCR to identify new endemic areas of *Echinococcus multilocularis* in France.  
290 Parasitol Res. 2016; Nov 115 (11): 4437-41. doi:10.1007/s00436-016-5220-1
- 291 14. Casulli A, La Rosa G, Pozio E, Manfredi MT, Di Cerbo AR, Genchi C et al. *Echinococcus multilocularis*  
292 in red foxes (*Vulpes vulpes*) of the Italian Alpine region: Is there a focus of autochthonous  
293 transmission? Int J Parasitol. 2005; Sep 35 (10):RC 1079–83. doi:10.1016/j.ijpara.2005.04.005
- 294 15. Massolo A, Valli D, Wassermann M, Cavallero S, D’Amelio S, Meriggi A, et al. Unexpected  
295 *Echinococcus multilocularis* infections in shepherd dogs and wolves in south-western Italian Alps: a  
296 new endemic area? Int J Parasitol Parasites Wildl. 2018; Aug 13; 7 (3): 309–16. doi:  
297 10.1016/j.ijppaw.2018.08.001
- 298 16. Santa M, Musiani M, Ruckstuhl K, & Massolo A. A review on invasions by parasites with complex  
299 life cycles: The European strain of *Echinococcus multilocularis* in North America as a model.  
300 Parasitology. 2021; 1-13. doi: <https://doi.org/10.1017/S0031182021001426>
- 301 17. Citterio CV, Obber F, Trevisiol K, Dellamaria D, Celva R, Bregoli M, et al. *Echinococcus multilocularis*  
302 and other cestodes in red foxes (*Vulpes vulpes*) of northeast Italy, 2012-2018. Parasit Vectors. 2021;  
303 Jan 7; 14(1):29. doi: 10.1186/s13071-020-04520-5
- 304 18. Otero-Abad B, Armua-Fernandez MT, Deplazes P, Torgerson PR, Hartnack S. Latent class models  
305 for *Echinococcus multilocularis* diagnosis in foxes in Switzerland in the absence of a gold standard.  
306 Parasit Vectors. 2017; 10(1):612. doi: 10.1186/s13071-017-2562-1
- 307 19. Knapp J, Umhang G, Poulle ML, Millon L. Development of a real-time PCR for a sensitive one-step  
308 copro-diagnosis allowing both the identification of carnivore feces and the detection of *Toxocara spp.*

- 309 and *Echinococcus multilocularis*. Appl Environ Microbiol. 2016; 82(10): 2950-58. doi:  
310 10.1128/AEM.03467-15
- 311 20. Santa MA, Pastran S, Klein C. et al. Evaluation of an automated magnetic bead-based DNA  
312 extraction and real-time PCR in fecal samples as a pre-screening test for detection of *Echinococcus*  
313 *multilocularis* and *Echinococcus canadensis* in coyotes. Parasitol Res. 2019; 118: 119-25. doi:  
314 10.1007/s00436-018-6125-y
- 315 21. Hall TA. BioEdit a user-friendly biological sequence alignment editor and analysis program for  
316 Windows 95/98/NT. 1999. In (pp. 95-98). Nucleic Acids Symposium Series: Oxford University Press.
- 317 22. Santa MA, Pastran SA, Klein C, Duignan P, Ruckstuhl K, Romig T, et al. Detecting co-infections of  
318 *Echinococcus multilocularis* and *Echinococcus canadensis* in coyotes and red foxes in Alberta, Canada  
319 using real-time PCR. Int J Parasitol Parasites Wildl. 2018; Mar 7(2): 111-15. doi:  
320 10.1016/j.ijppaw.2018.03.001
- 321 23. Lang Z, Reiczigel J. Confidence limits for prevalence of disease adjusted for estimated sensitivity  
322 and specificity. Prev Vet Med 2014; 113: 13-22. doi: 10.1016/j.prevetmed.2013.09.015
- 323 24. Casulli A, Possenti A, La Torre G et al. *Echinococcus multilocularis* infection in animals  
324 (GP/EFSA/AHAW/2012/01). EFSA supporting publication. 2015; EN-882, 168 pp.
- 325 25. Deplazes P, Alther P, Tanner I, Thompson RC, Eckert J. *Echinococcus multilocularis* coproantigen  
326 detection by enzyme-linked immunosorbent assay in fox, dog, and cat populations. J Parasitol. 1999;  
327 Feb; 85(1):115-21.
- 328 26. Bretagne S, Guillou JP, Morand M, Houin R. Detection of *Echinococcus multilocularis* DNA in fox  
329 faeces using DNA amplification. Parasitology. 1993; Feb; 106 (Pt 2):193-9. doi:  
330 10.1017/s0031182000074990

- 331 27. Eckert J. Predictive values and quality control of techniques for the diagnosis of *Echinococcus*  
332 *multilocularis* in definitive hosts. Acta Trop. 2003; Feb; 85:157–63. doi: 10.1016/s0001-  
333 706x(02)00216-4
- 334 28. Taberlet P. and Luikart G. Non-invasive genetic sampling and individual identification. Biol. J. Linn.  
335 Soc. 1999; 68: 41-55. <https://doi.org/10.1111/j.1095-8312.1999.tb01157.x>
- 336 29. Da Silva AM, Courquet S, Raoul F, Rieffel D, Giraudoux P, Millon L, et al. Assessment of the  
337 exposure to *Echinococcus multilocularis* associated with carnivore faeces using real-time quantitative  
338 PCR and flotation technique assays. Int J Parasitol. 2020; Dec; 50(14): 1195-1204. doi:  
339 10.1016/j.ijpara.2020.07.008
- 340 30. Tamarozzi F, Legnardi M, Fittipaldo A, Drigo M, Cassini R. Epidemiological distribution of  
341 *Echinococcus granulosus s.l.* infection in human and domestic animal hosts in European  
342 Mediterranean and Balkan countries: A systematic review. PLOS Negl. Trop. Dis. 2020; 14(8). doi:  
343 10.1371/journal.pntd.0008519



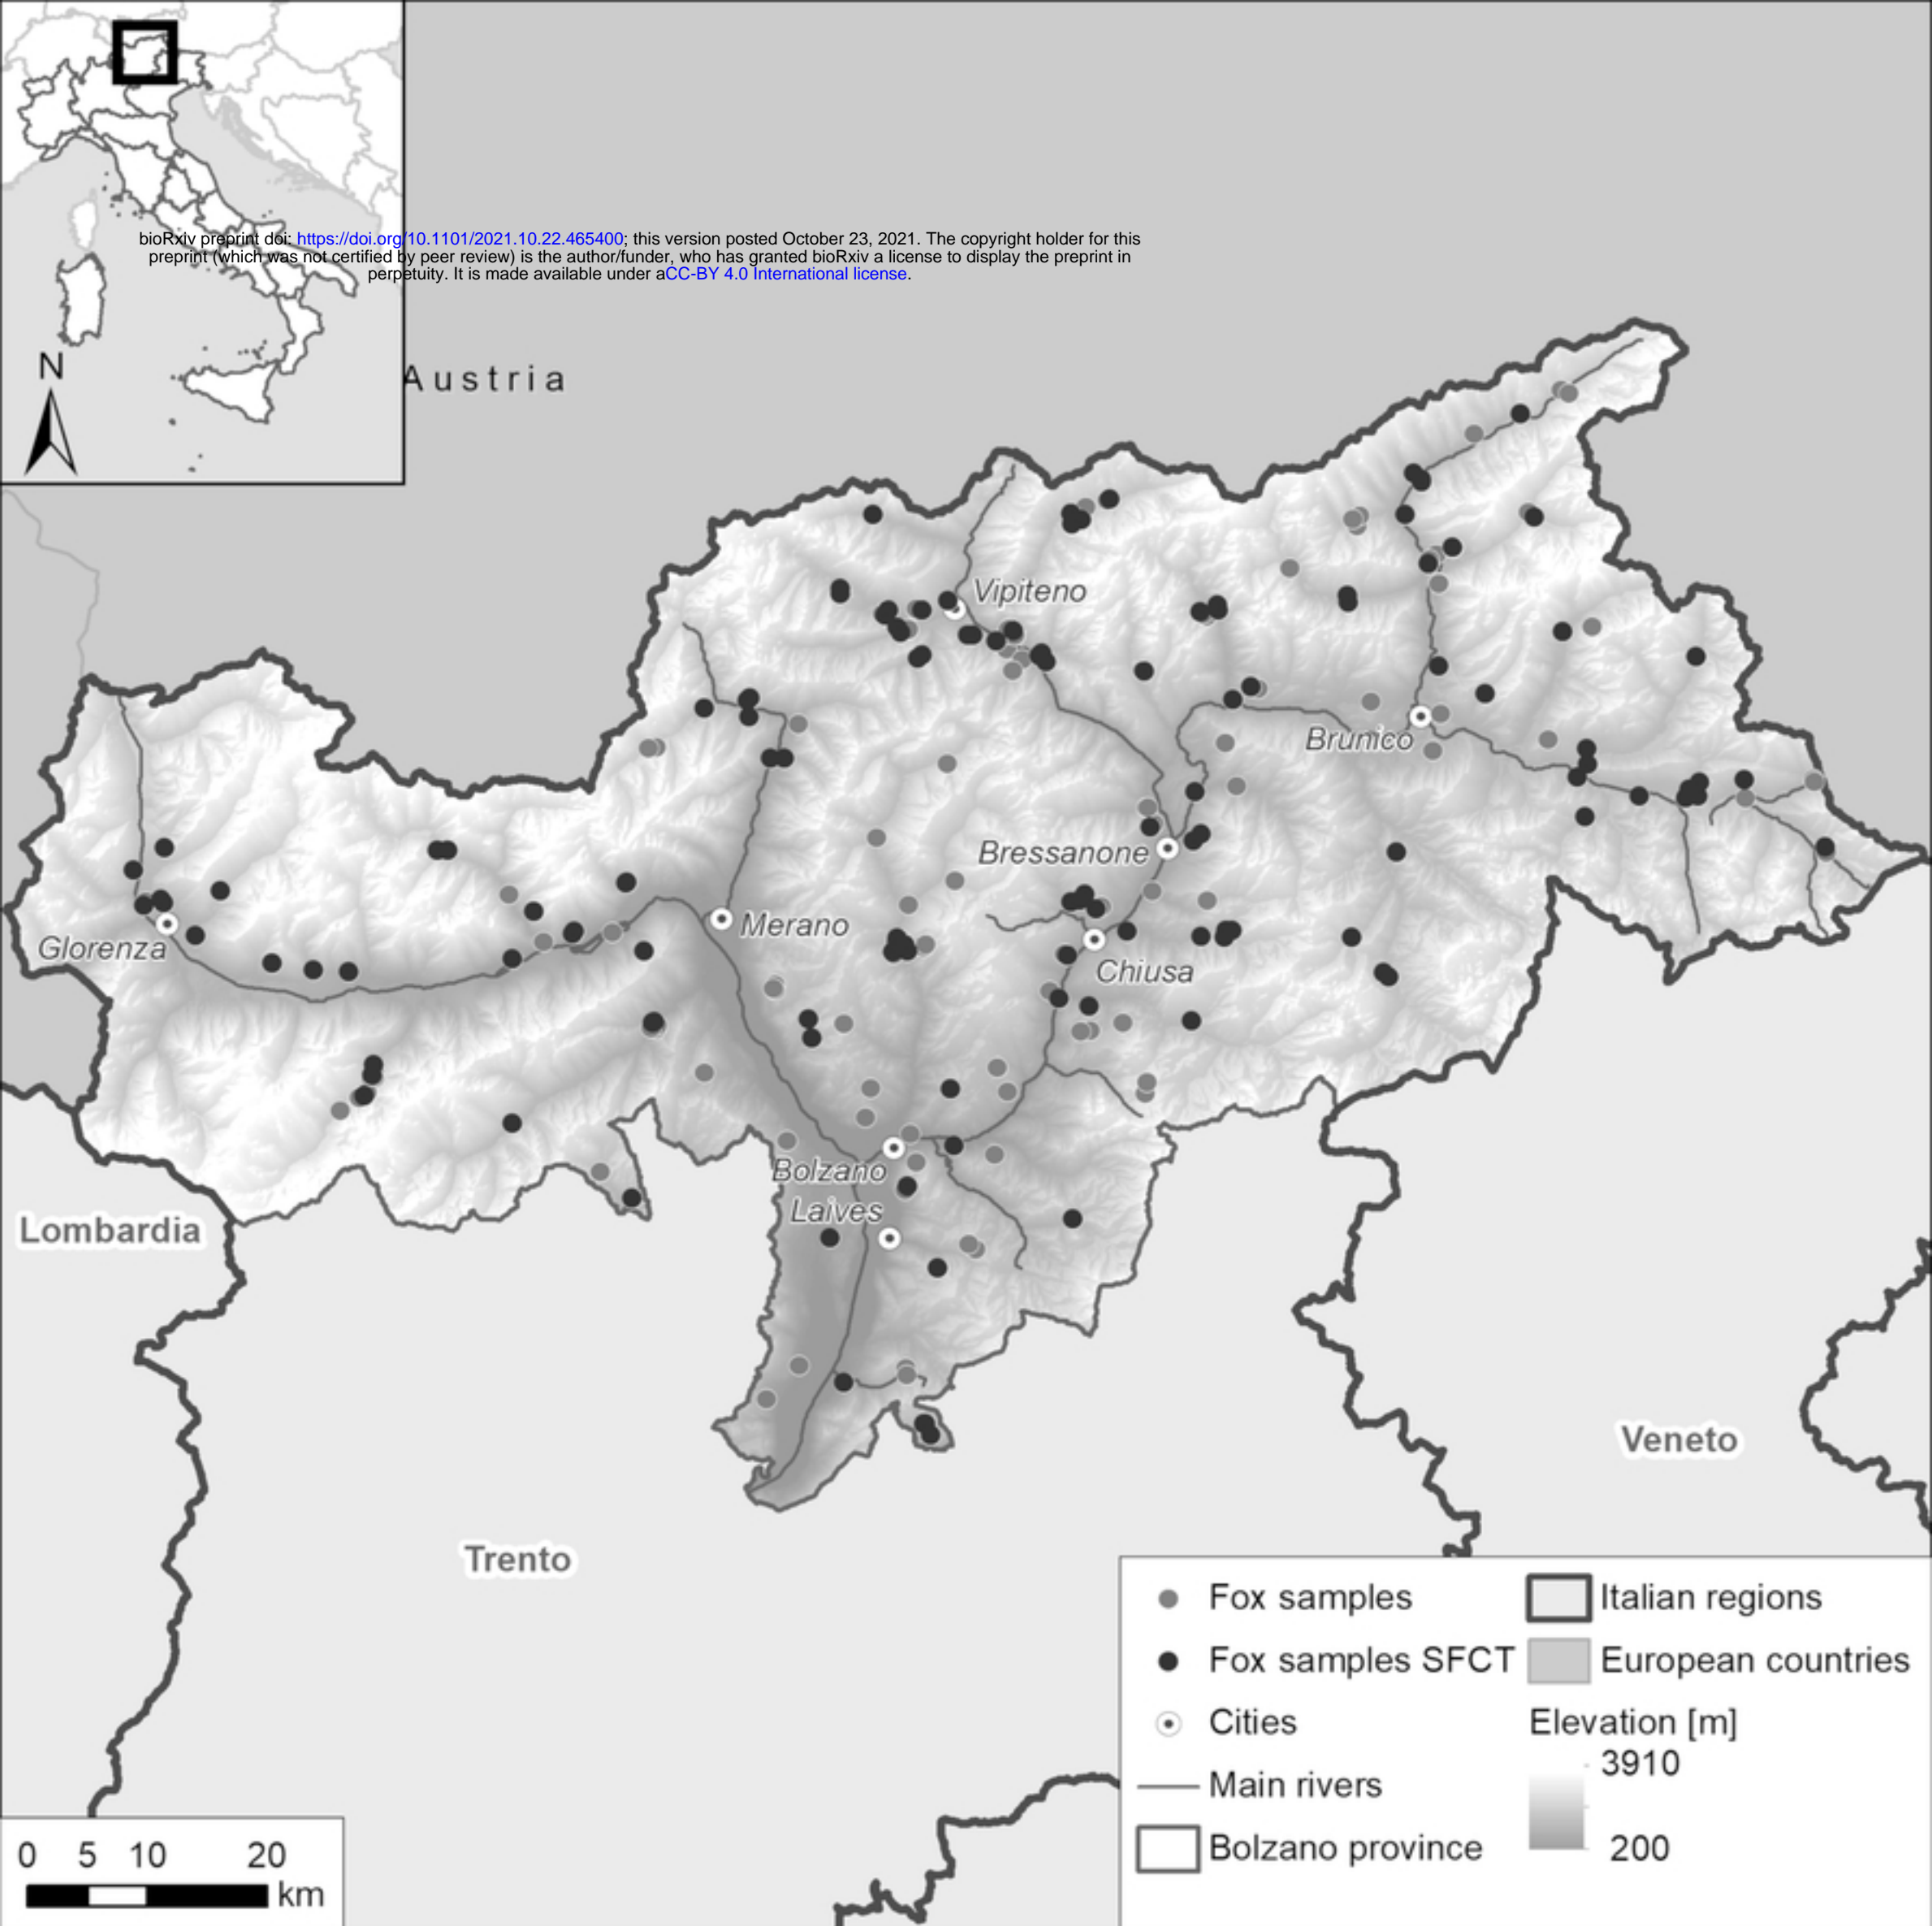

Fig1

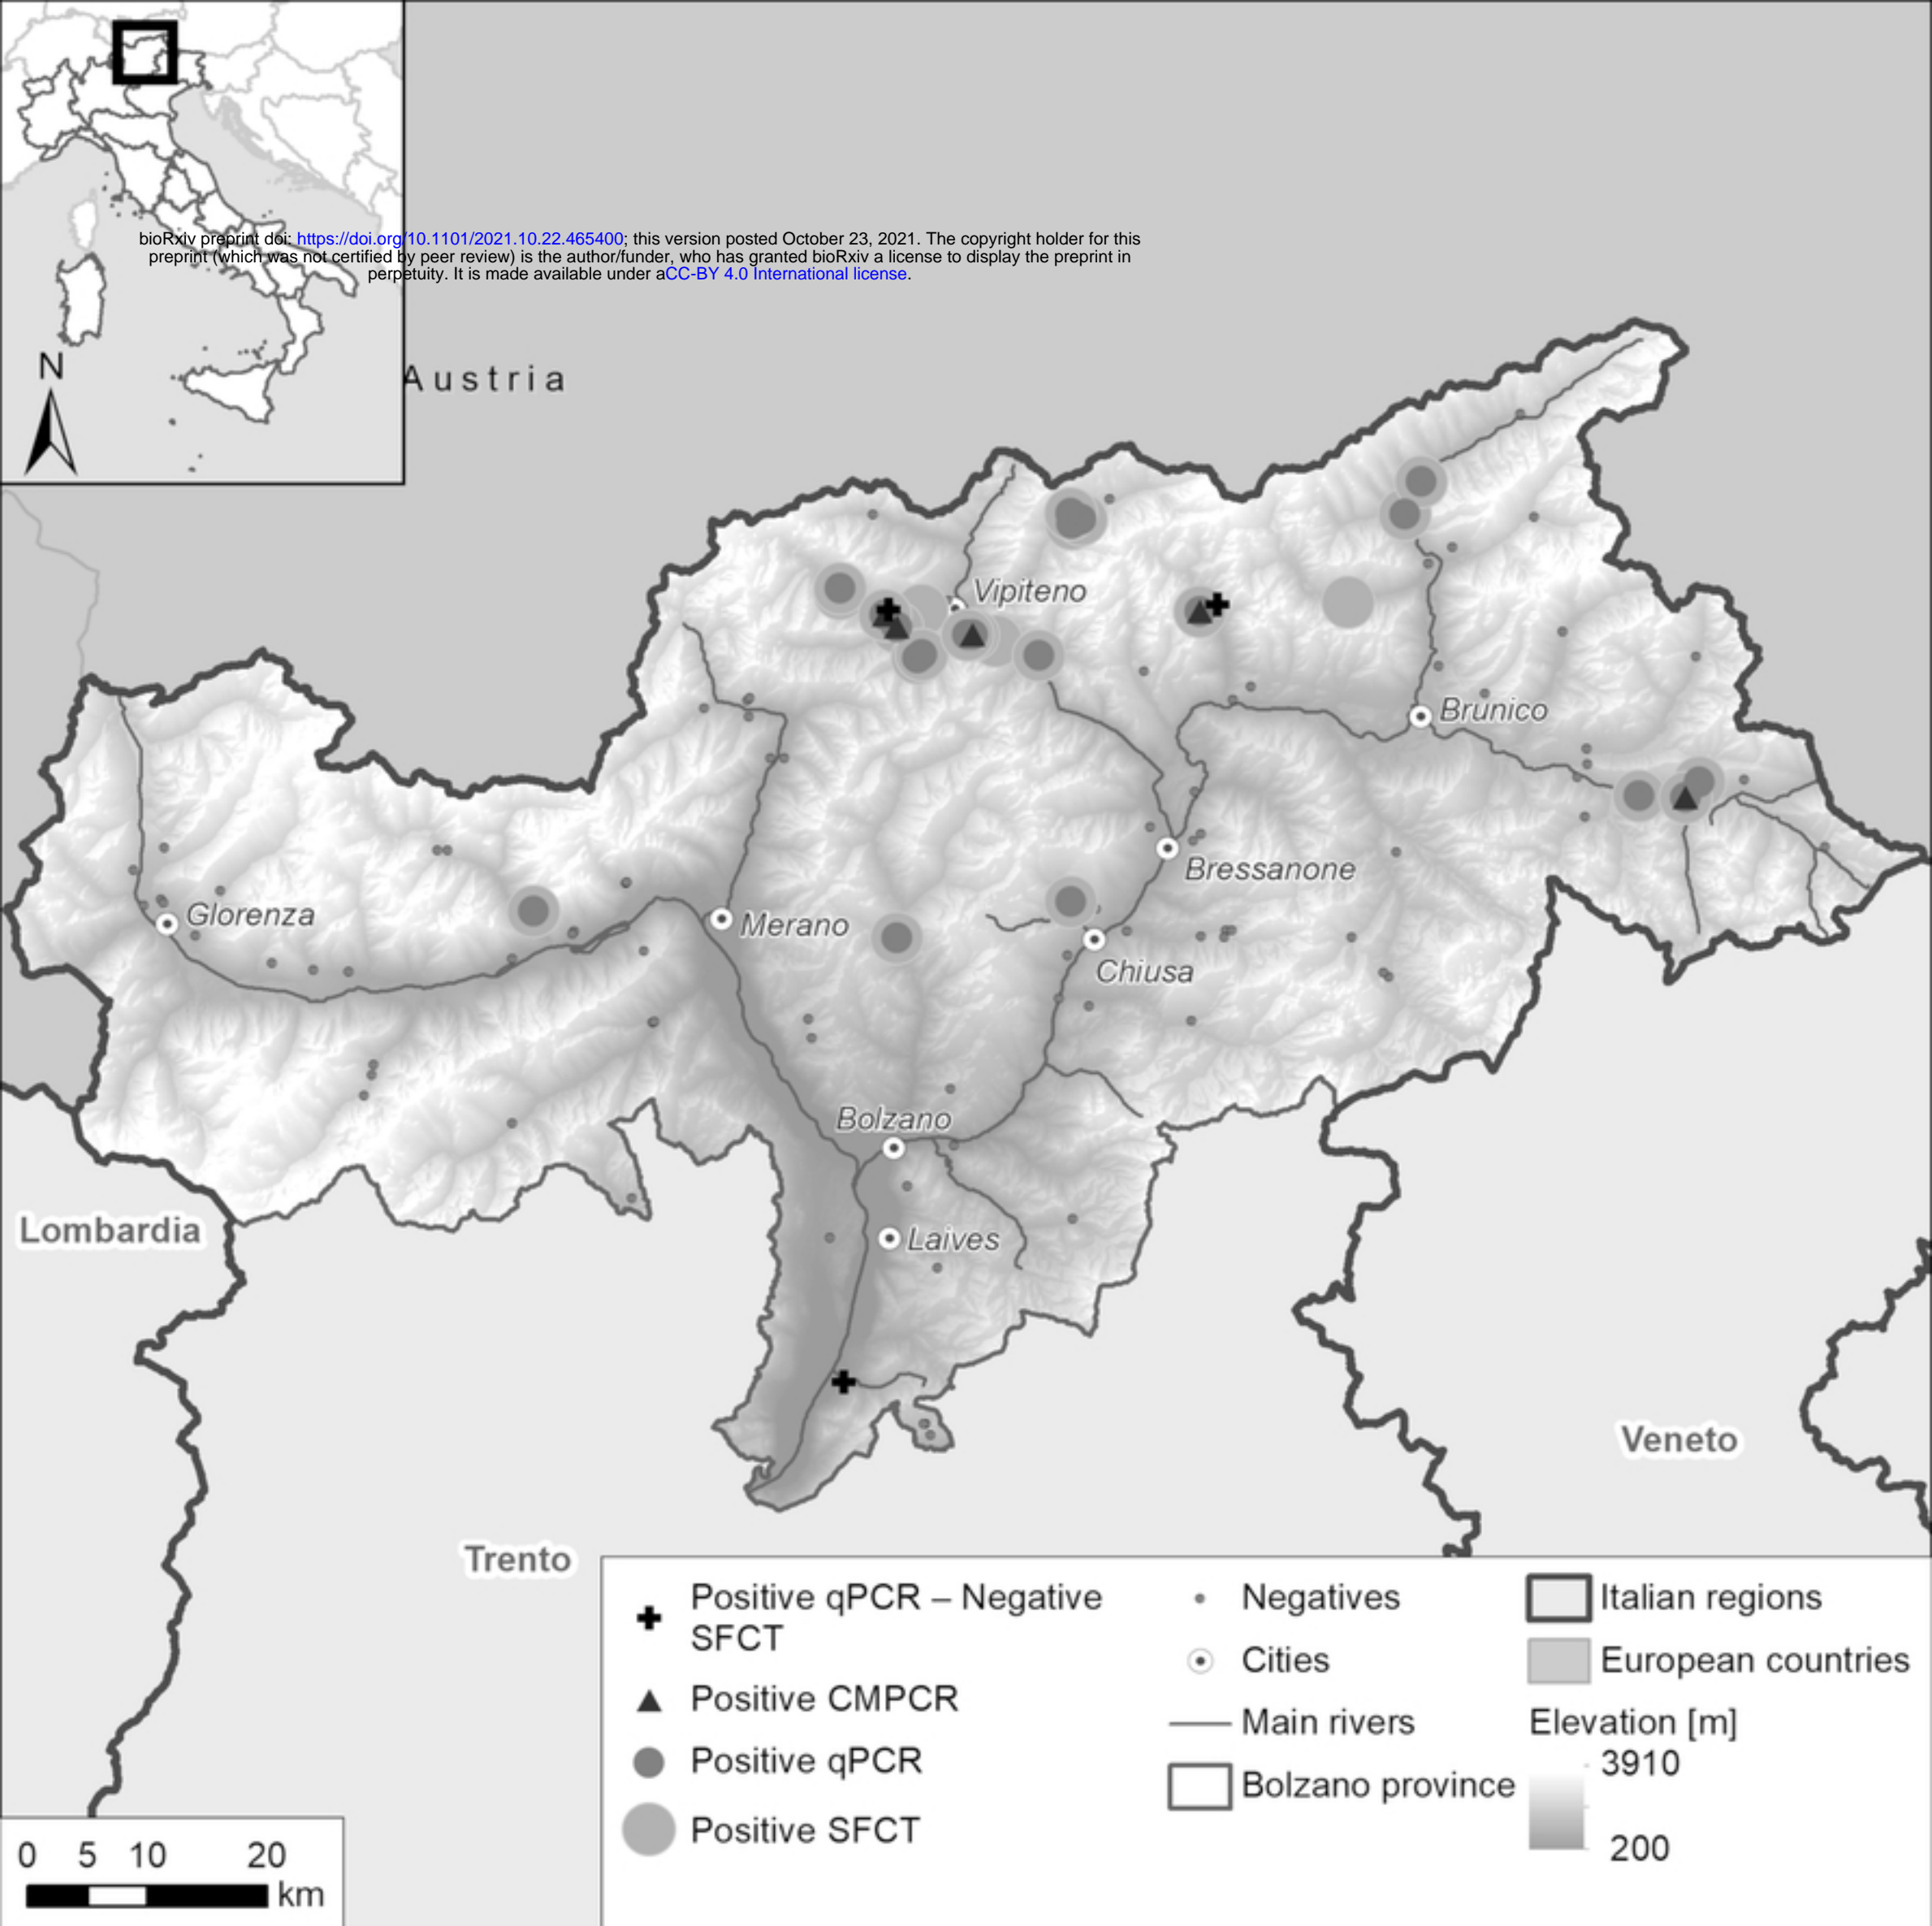

Fig2

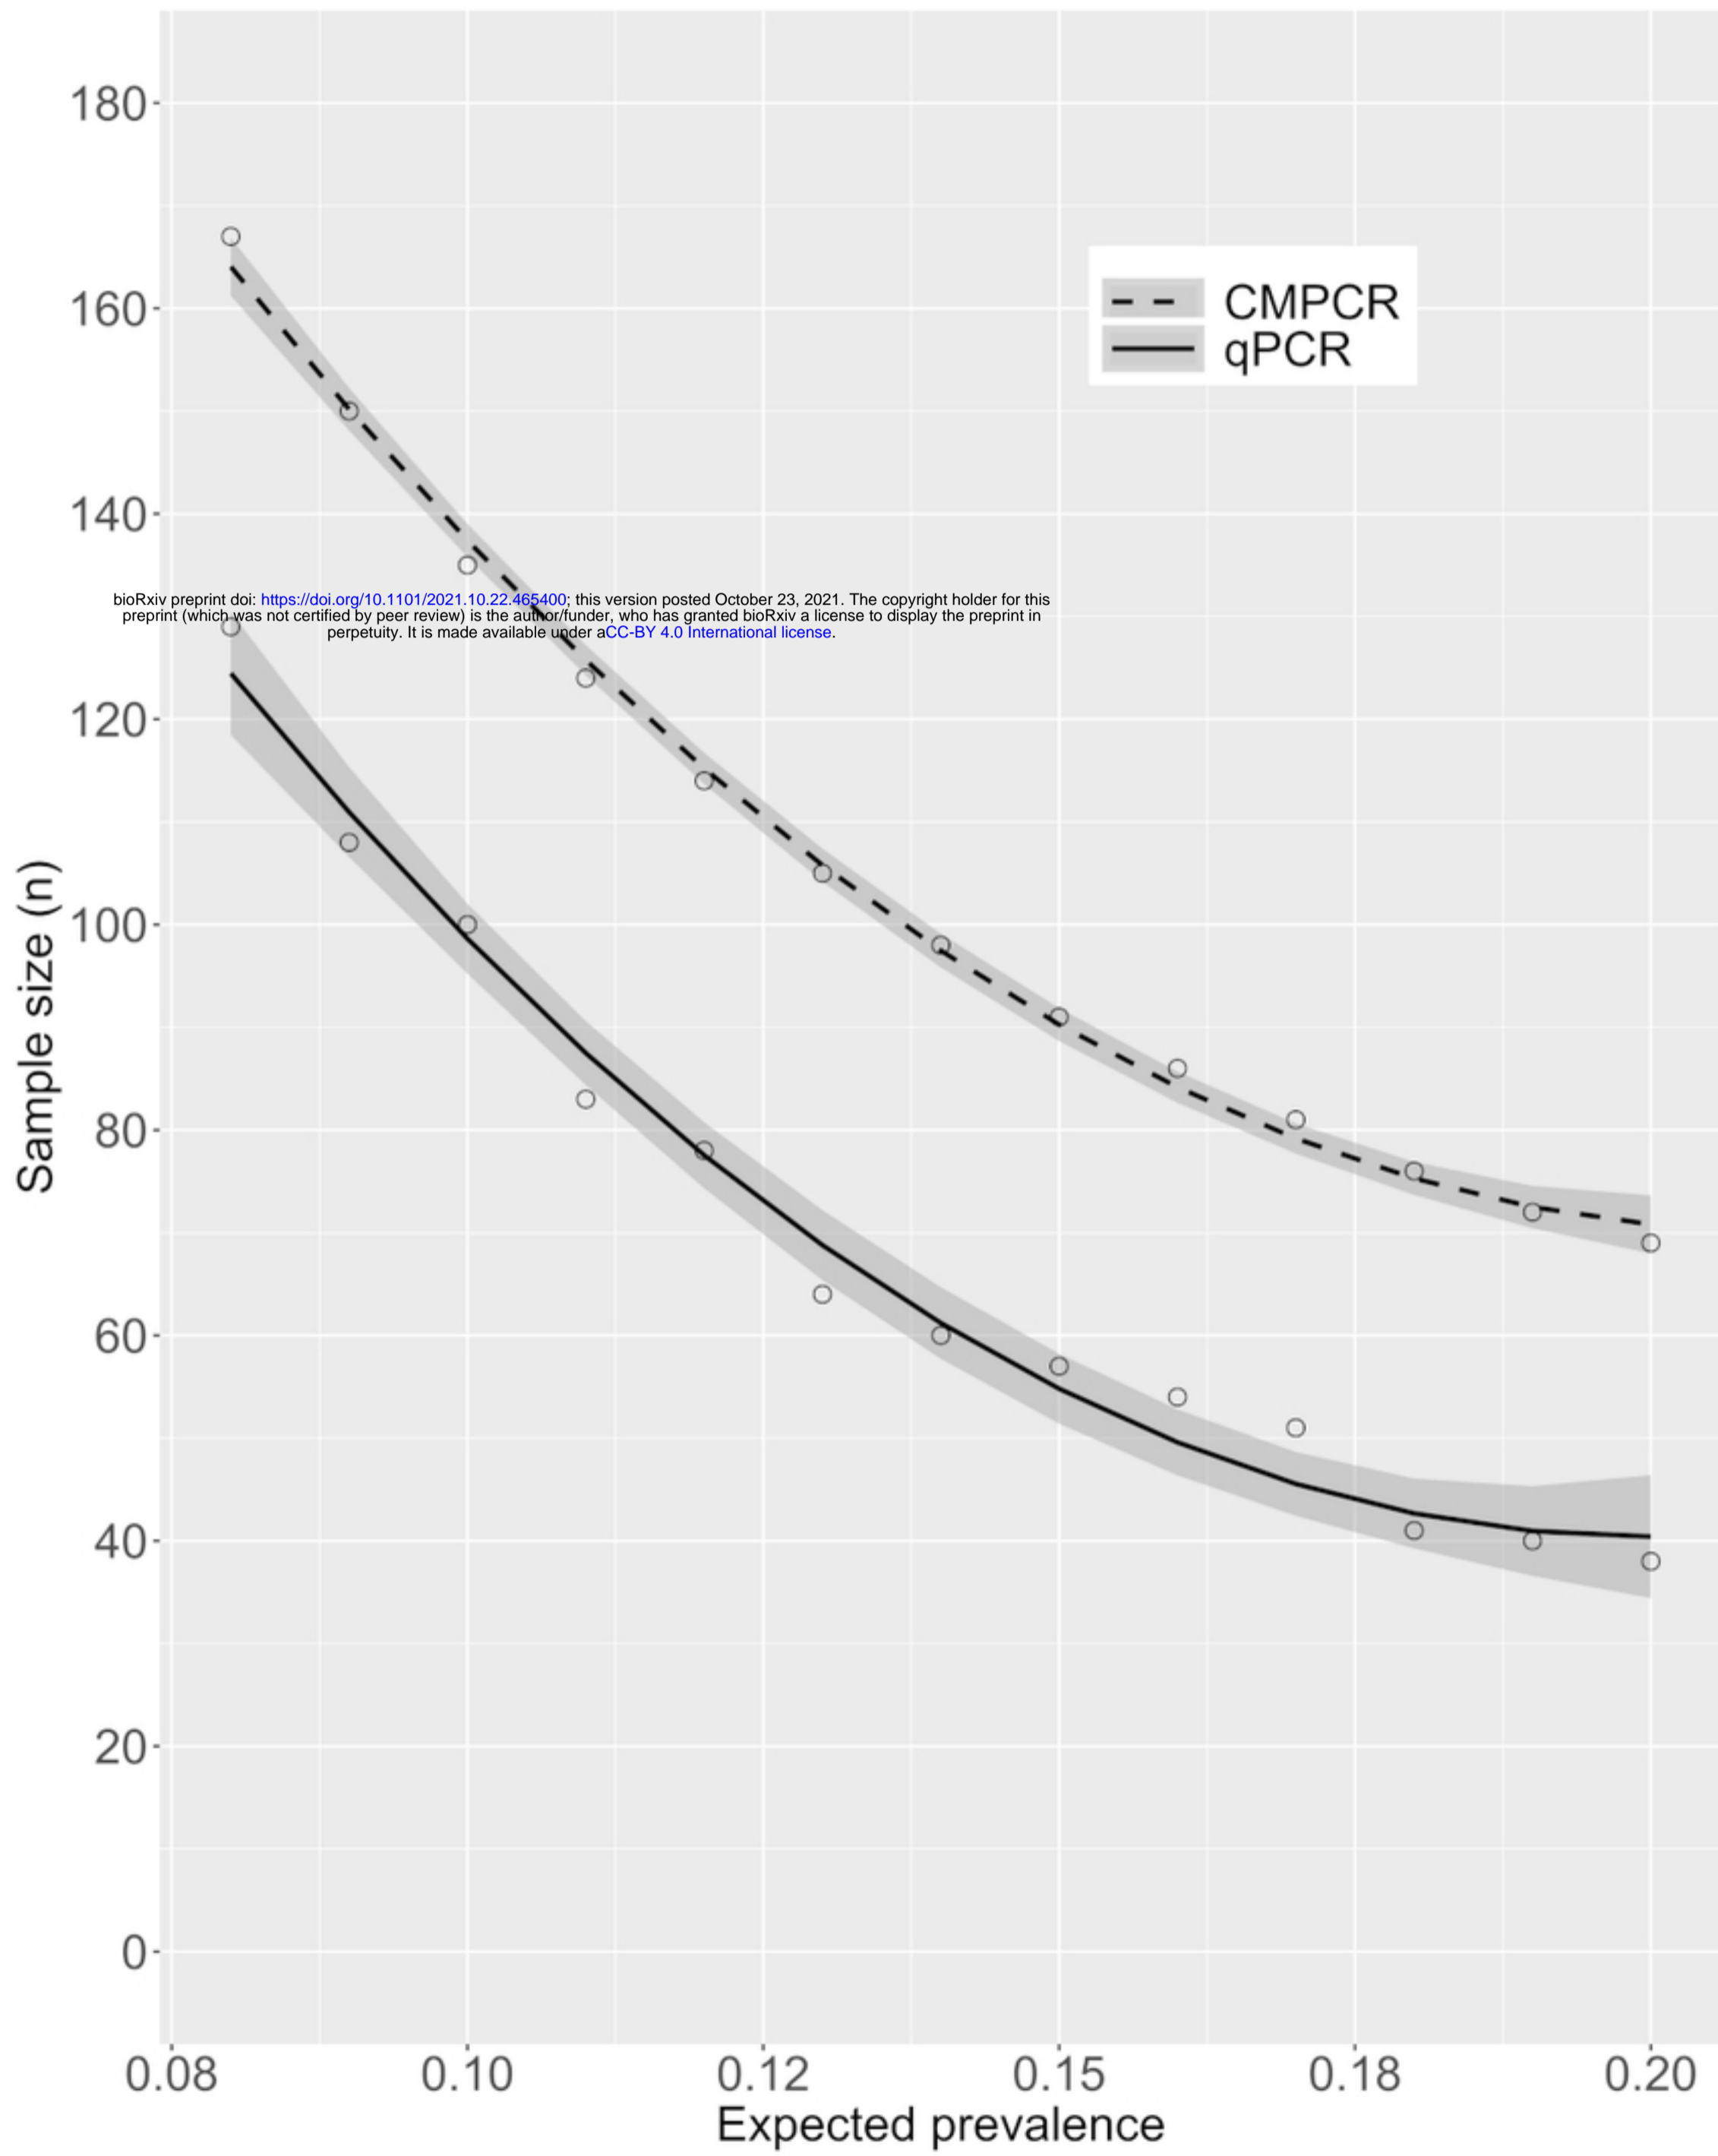

Fig3
